# Supplementary material for: Cortical Bone Morphological and Trabecular Bone Microarchitectural Changes in the Mandible and Femoral Neck of Ovariectomized Rats
Source: PubMed Central journal article supplement (PMC4851407; doi:10.1371/journal.pone.0154367), 2016-04-29
Supplement: pone.0154367.s002.pdf [file pone.0154367.s002.pdf]

S2 Table. Measurement results of all rats in both groups.

| Group   | No.     | Mandibule       |             |             |              |               | Femoral neck    |             |             |              |                         |                         |           |           |
|---------|---------|-----------------|-------------|-------------|--------------|---------------|-----------------|-------------|-------------|--------------|-------------------------|-------------------------|-----------|-----------|
|         |         | Trabecular bone |             |             |              | Cortical bone | Trabecular bone |             |             |              | Cortical bone           |                         |           |           |
|         |         | BV/TV (%)       | Tb. Th (mm) | Tb. Sp (mm) | Tb. N (1/mm) | CtTh (mm)     | BV/TV (%)       | Tb. Th (mm) | Tb. Sp (mm) | Tb. N (1/mm) | CtAr (mm <sup>2</sup> ) | TtAr (mm <sup>2</sup> ) | CtAr/TtAr | CtTh (mm) |
| Control | 1       | 54.580          | 0.253       | 0.272       | 2.157        | 0.834         | 62.762          | 0.147       | 0.143       | 4.275        | 3.151                   | 4.826                   | 0.653     | 0.484     |
|         | 2       | 51.522          | 0.236       | 0.261       | 2.187        | 1.011         | 54.068          | 0.119       | 0.134       | 4.538        | 2.606                   | 3.853                   | 0.676     | 0.488     |
|         | 3       | 59.420          | 0.267       | 0.291       | 2.226        | 0.887         | 76.934          | 0.166       | 0.112       | 4.627        | 2.730                   | 3.776                   | 0.723     | 0.568     |
|         | 4       | 49.154          | 0.219       | 0.333       | 2.240        | 0.787         | 59.636          | 0.132       | 0.158       | 4.527        | 2.417                   | 3.287                   | 0.735     | 0.500     |
|         | 5       | 49.665          | 0.242       | 0.302       | 2.055        | 0.819         | 58.744          | 0.121       | 0.124       | 4.863        | 3.046                   | 4.913                   | 0.620     | 0.455     |
|         | 6       | 51.885          | 0.232       | 0.279       | 2.241        | 0.826         | 66.172          | 0.151       | 0.125       | 4.396        | 2.671                   | 3.891                   | 0.687     | 0.500     |
|         | Median= | 51.704          | 0.239       | 0.285       | 2.206        | 0.830         | 61.199          | 0.139       | 0.130       | 4.532        | 2.701                   | 3.872                   | 0.682     | 0.494     |
|         | IQR=    | 6.253           | 0.028       | 0.041       | 0.108        | 0.107         | 11.288          | 0.034       | 0.026       | 0.320        | 0.513                   | 1.194                   | 0.081     | 0.040     |
|         | Max=    | 59.420          | 0.267       | 0.333       | 2.241        | 1.011         | 76.934          | 0.166       | 0.158       | 4.863        | 3.151                   | 4.913                   | 0.735     | 0.568     |
| Min=    | 49.154  | 0.219           | 0.261       | 2.055       | 0.787        | 54.068        | 0.119           | 0.112       | 4.275       | 2.417        | 3.287                   | 0.620                   | 0.455     |           |
| OVX     | 1       | 30.052          | 0.146       | 0.336       | 2.063        | 0.827         | 41.599          | 0.122       | 0.183       | 3.457        | 2.318                   | 3.520                   | 0.665     | 0.456     |
|         | 2       | 34.473          | 0.160       | 0.324       | 2.154        | 0.874         | 39.410          | 0.128       | 0.186       | 3.080        | 2.459                   | 3.391                   | 0.725     | 0.494     |
|         | 3       | 42.277          | 0.202       | 0.321       | 2.092        | 0.777         | 40.828          | 0.137       | 0.223       | 2.989        | 2.236                   | 2.965                   | 0.754     | 0.527     |
|         | 4       | 43.084          | 0.246       | 0.305       | 1.751        | 0.837         | 50.986          | 0.115       | 0.140       | 4.446        | 2.201                   | 3.371                   | 0.653     | 0.429     |
|         | 5       | 40.065          | 0.183       | 0.317       | 2.188        | 0.815         | 36.941          | 0.099       | 0.154       | 3.739        | 2.357                   | 4.023                   | 0.586     | 0.424     |
|         | 6       | 36.907          | 0.220       | 0.436       | 1.679        | 0.904         | 39.829          | 0.131       | 0.215       | 3.032        | 2.336                   | 3.852                   | 0.606     | 0.406     |
|         | Median= | 38.486          | 0.193       | 0.322       | 2.077        | 0.832         | 40.329          | 0.125       | 0.185       | 3.268        | 2.327                   | 3.456                   | 0.659     | 0.442     |
|         | IQR=    | 9.111           | 0.070       | 0.047       | 0.429        | 0.076         | 5.153           | 0.022       | 0.066       | 0.895        | 0.156                   | 0.625                   | 0.131     | 0.083     |
|         | Max=    | 43.084          | 0.246       | 0.436       | 2.188        | 0.904         | 50.986          | 0.137       | 0.223       | 4.446        | 2.459                   | 4.023                   | 0.754     | 0.527     |
| Min=    | 30.052  | 0.146           | 0.305       | 1.679       | 0.777        | 36.941        | 0.099           | 0.140       | 2.989       | 2.201        | 2.965                   | 0.586                   | 0.406     |           |
